# Supplementary material for: Dynamic Analysis of Stochastic Transcription Cycles
Source: PLOS journal article supplement (doi:10.1371/journal.pbio.1000607), 2011-04-12
Supplement: S3 (10.1371/journal.pbio.1000607.s003) [file journal.pbio.1000607.s003]

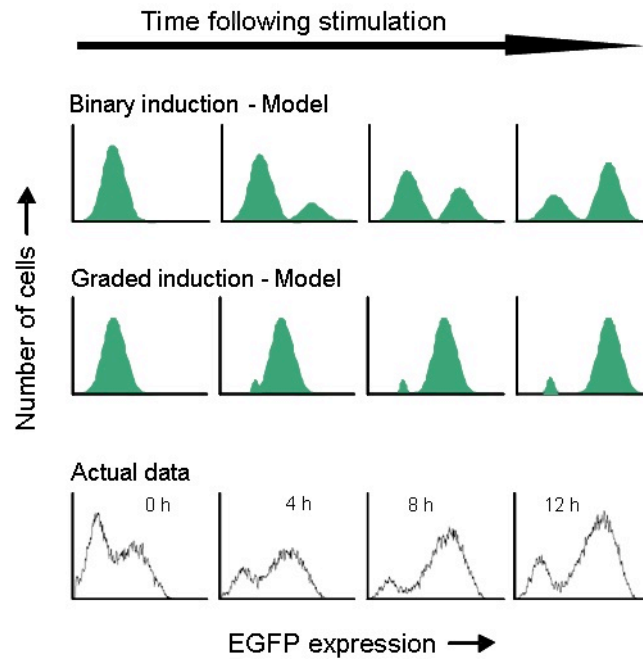

Fig. S3: Detection of single cell gene expression in GH3-DP1 cells, using the *PRL*-d2EGFP reporter construct. Possible hypothetical models of binary or graded transcriptional response are shown in green (upper panels), and experimental data are shown in the bottom panel. Flow cytometry indicated that the combined stimulus of FBK ( $5\mu\text{M}$  forskolin and  $0.5\mu\text{M}$  BayK-8644) significantly increased the expression of *PRL*-d2EGFP. A biphasic population was detected under control conditions. Stimulation induced a significant increase in EGFP transcription, with increasing proportions of cells displaying high signal, and the bi-modality of the population persisted over at least 12h.
