# Supplementary material for: Dynamic Analysis of Stochastic Transcription Cycles
Source: PLOS journal article supplement (doi:10.1371/journal.pbio.1000607), 2011-04-12
Supplement: S5 (10.1371/journal.pbio.1000607.s005) [file journal.pbio.1000607.s005]

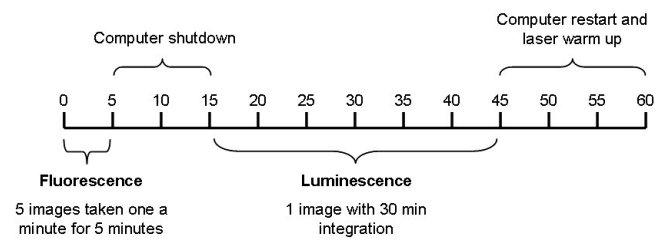

**Fig. S5:** Time line outlining the process of capturing sequential fluorescence and luminescence images from the same single cells. Numbers represent time in minutes.
