# Supplementary material for: Dynamic Analysis of Stochastic Transcription Cycles
Source: PLOS journal article supplement (doi:10.1371/journal.pbio.1000607), 2011-04-12
Supplement: S7 (10.1371/journal.pbio.1000607.s007) [file journal.pbio.1000607.s007]

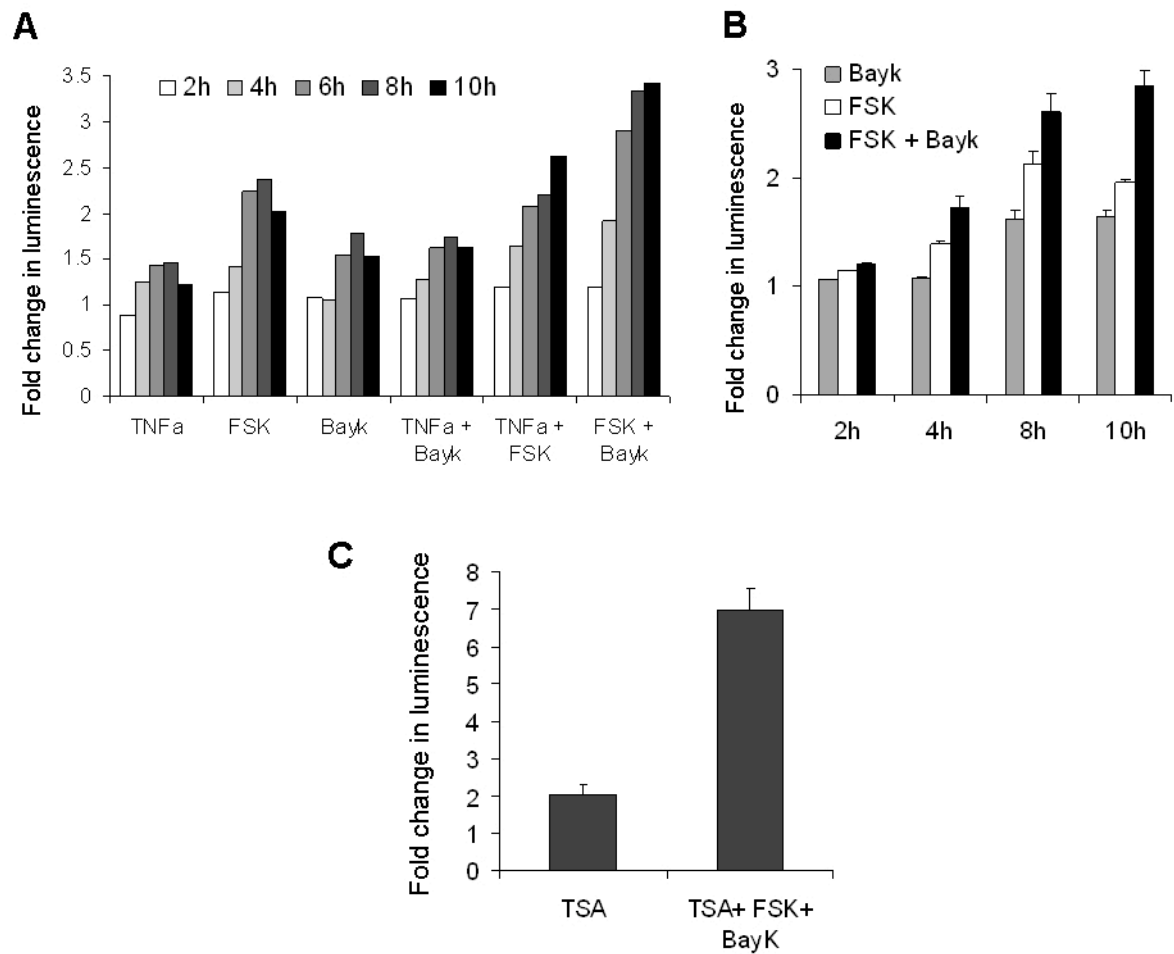

Fig. S7: The effect of various stimuli and combinations of stimuli on expression of *PRL* were assessed using luminometry. (A, B) 10ng/ml TNF $\alpha$ , 5 $\mu$ M forskolin (FSK), 0.5 $\mu$ M BayK-8644 (BayK) were used. (C) The effect of TSA (30ng/ml) and TSA in combination with 5 $\mu$ M FSK and 0.5 $\mu$ M BayK (FBK).
