# Supplementary material for: Dynamic Analysis of Stochastic Transcription Cycles
Source: PLoS Biol. 2011 Apr 12;9(4):e1000607. doi: 10.1371/journal.pbio.1000607 (PMC3075210; doi:10.1371/journal.pbio.1000607)
Supplement: Table S2 — List of dual reporter experiments. For the correlation analysis, data from unstimulated experiments were pooled according to cell type into DP1, DP2, and primary. Data were also pooled according to stimulus into unstim, FBK, TSA, and TSA+FBK. Column 4 gives time of stimulation for stimulated experiments. Column 5 gives number of cells per experiment used for analysis after discarding cells with very low amplitude (number before discarding in brackets). The final column gives number of data points measured at hourly intervals. Data for the two reporters are not taken at identical time points, but this is corrected for in the analysis. (0.03 MB PDF) [file pbio.1000607.s019.pdf]

| Experiment  | Cell type | Stimulus | Stimulation time | Number of Cells $N$ | length (h) |
|-------------|-----------|----------|------------------|---------------------|------------|
| C1-unstim1  | DP1       | unstim   | N/A              | 29 (33)             | 15         |
| C1-unstim2  | DP1       | unstim   | N/A              | 21 (24)             | 14         |
| C1-unstim3  | DP1       | unstim   | N/A              | 13 (14)             | 15         |
| C1-unstim4  | DP1       | unstim   | N/A              | 20 (20)             | 21         |
| C2-unstim1  | DP2       | unstim   | N/A              | 21 (21)             | 15         |
| C2-unstim2  | DP2       | unstim   | N/A              | 15 (15)             | 14         |
| Pr-unstim1  | primary   | unstim   | N/A              | 6 (6)               | 20         |
| Pr-unstim2  | primary   | unstim   | N/A              | 16 (16)             | 19         |
| C1-FBK1     | DP1       | FBK      | t=1              | 11 (15)             | 13         |
| C1-FBK2     | DP1       | FBK      | t=1              | 15 (15)             | 17         |
| C1-FBK3     | DP1       | FBK      | t=1              | 9 (11)              | 12         |
| C1-FBK4     | DP1       | FBK      | t=4              | 16 (17)             | 13         |
| C1-FBK5     | DP1       | FBK      | t=1              | 43 (46)             | 10         |
| C1-TSA1     | DP1       | TSA      | t=7              | 13 (15)             | 17         |
| C1-TSA2     | DP1       | TSA      | t=4              | 8 (9)               | 14         |
| C1-TSA3     | DP1       | TSA      | t=4              | 17 (20)             | 14         |
| C1-TSA4     | DP1       | TSA      | t=1              | 13 (16)             | 16         |
| C1-TSA5     | DP1       | TSA      | t=1              | 23 (30)             | 9          |
| C1-TSA-FBK1 | DP1       | TSA+FBK  | t=2              | 13 (19)             | 15         |
| C1-TSA-FBK2 | DP1       | TSA+FBK  | t=2              | 17 (20)             | 15         |
| C1-TSA-FBK3 | DP1       | TSA+FBK  | t=1              | 11 (11)             | 9          |

Table S2: List of dual reporter experiments. For the correlation analysis data from unstimulated experiments were pooled according to cell type into DP1, DP2, and primary. Data were also pooled according to stimulus into unstim, FBK, TSA, and TSA+FBK. Column 4 gives time of stimulation for stimulated experiments. Column 5 gives number of cells per experiment used for analysis after discarding cells with very low amplitude (number before discarding in brackets). The final column gives number of data points measured at hourly intervals. Data for the two reporters are not taken at identical time points but this is corrected for in the analysis.
